# Supplementary material
Source: PubMed Central journal article supplement (PMC4279219)
Supplement: NIHMS522948-supplement-01.pdf [file NIHMS522948-supplement-01.pdf]

## ONLINE SUPPLEMENT

### A risk factor-based predictive model of outcomes in carotid endarterectomy: the National Surgical Quality Improvement

#### Program 2005-2010

Kimon Bekelis, M.D.<sup>1,\*</sup>, Samuel F. Bakhoum, Ph.D.<sup>2,\*</sup>, Atman Desai, M.D.<sup>1</sup>, Todd A. MacKenzey, Ph.D.<sup>3</sup>, Philip Goodney, M.D.<sup>4</sup>,

Nicos Labropoulos, Ph.D., D.I.C.<sup>5</sup>

<sup>1</sup>Section of Neurosurgery, Dartmouth-Hitchcock Medical Center, Lebanon, NH

<sup>2</sup>Geisel School of Medicine at Dartmouth, Hanover, NH

<sup>3</sup>Department of Medicine, Dartmouth-Hitchcock Medical Center, Lebanon, NH

<sup>4</sup>Section of Vascular Surgery, Dartmouth-Hitchcock Medical Center, Lebanon, NH

<sup>5</sup>Section of Vascular Surgery, SUNY Stony Brook, Stony Brook, NY

\*These authors contributed equally to this work and co-primary authors

**Running Head:** NSQIP: predictive model of CEA outcomes

**Subject codes:** [44], [49], [76]

**Key words:** carotid stenosis, carotid endarterectomy, risk prediction, NSQIP

**Figures:** 3, **Tables:** 2, **Supplemental material:** 1

**Word count:** 4,500

**Corresponding Author:**

Kimon Bekelis, M.D.

Dartmouth-Hitchcock Medical Center

One Medical Center Dr.

Lebanon, NH 03756

[kbekelis@gmail.com](mailto:kbekelis@gmail.com)

T: 603-650-5110

F: 603-650-4547

## Supplemental Figures

Figure 1. Diagrams of receiver operating characteristic (ROC) curves demonstrating the sensitivity against the 1-specificity for all the predictive models for the 30-day postoperative risk of stroke, MI, death, or their combination (*from left to right*).

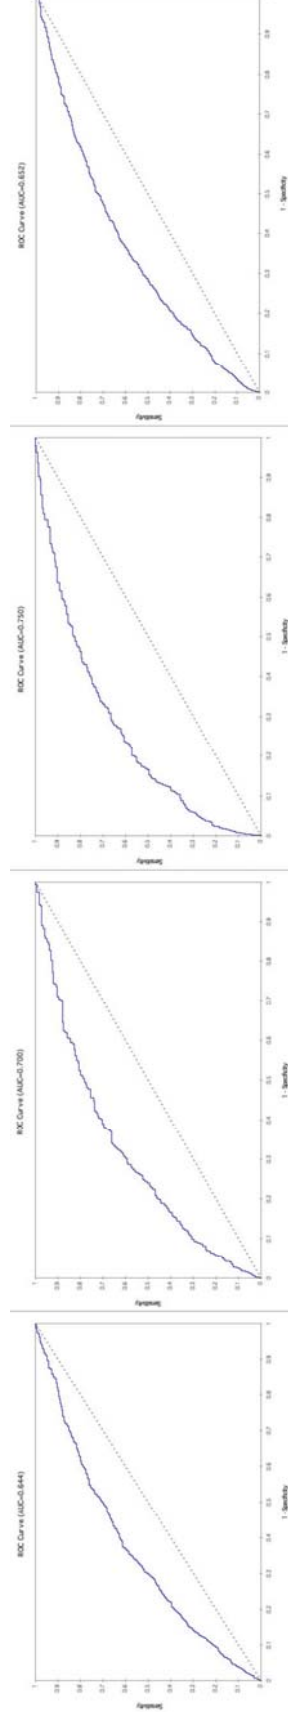

Figure 2. Multivariate analysis of the 30-day risk of stroke (A), myocardial infarction (B), death (C), or their combination after carotid endarterectomy (D). The odds ratios are represented with forest plots on the right side of each table.

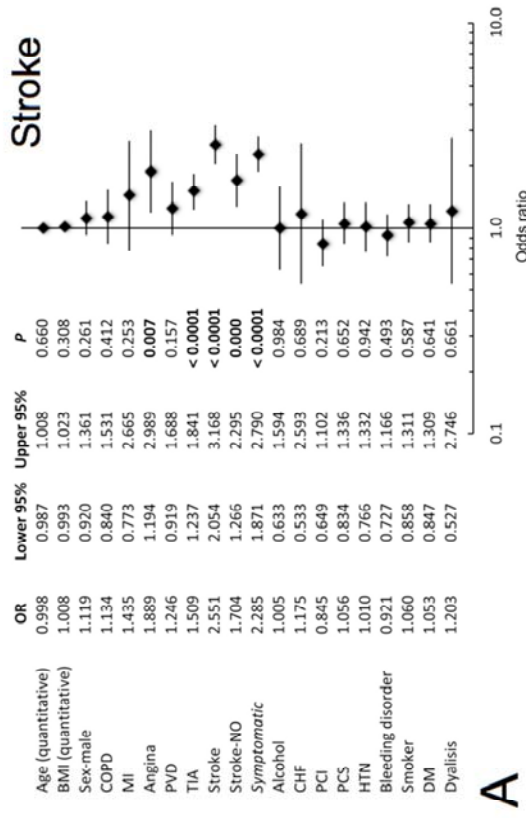

**A**

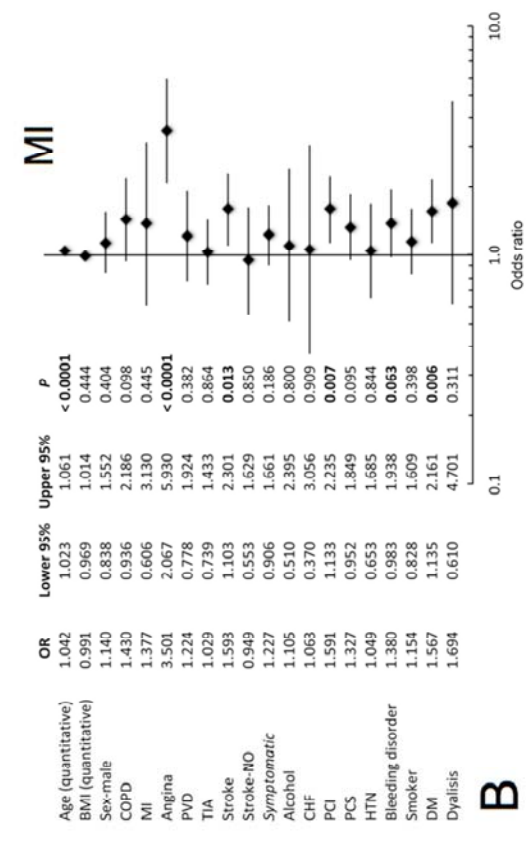

**B**

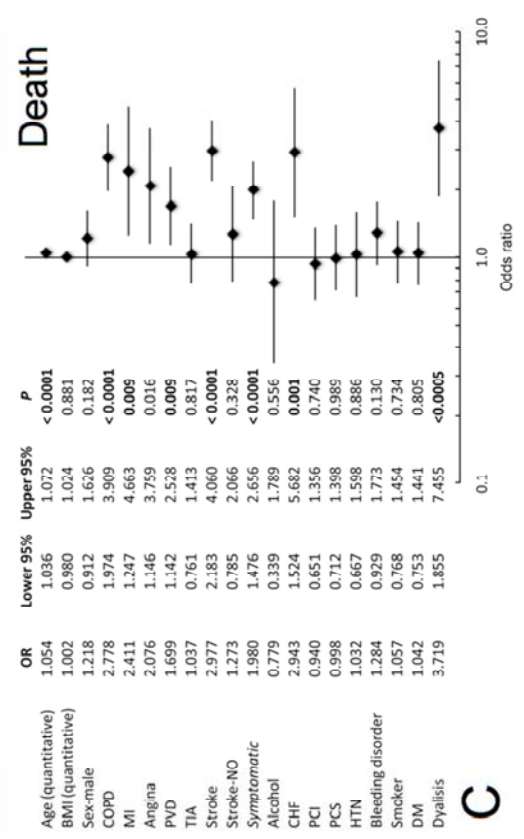

**C**

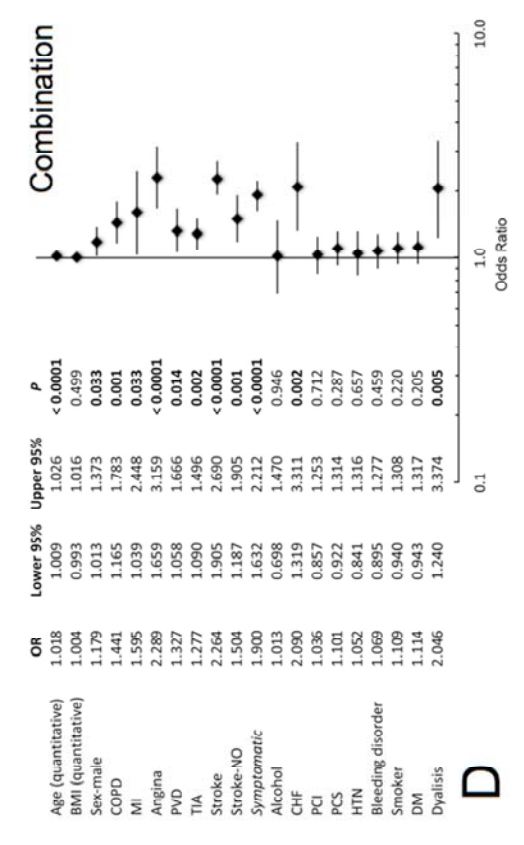

**D**
